# Supplementary material for: Genome-Based Characterization of Biological Processes That Differentiate Closely Related Bacteria
Source: Front Microbiol. 2018 Feb 6;9:113. doi: 10.3389/fmicb.2018.00113 (PMC5808187; doi:10.3389/fmicb.2018.00113)
Supplement: Supplementary File S3 — The summary of differences in pathways requiring 2 or more genes, as well as a summary of the BLAST confirmations of these genes. [file DataSheet3.XLSX]

## Sheet: Differences >2 genes
Process/es	Reactions	Gene/s	P. agglomerans lineage	P. ananatis lineage	P. dispersa lineage	P. rodasii lineages
Polyketide sugar unit biosynthesis	dTDP-4-oxo-6-deoxy-D-glucose <-> dTDP-4-dehydro-beta-L-rhamnose	rfbC	-	+	-	-
Polyketide sugar unit biosynthesis	dTDP-L-rhamnose <-> dDTP-4-dehydro-beta-L-rhamnose	rfbD	-	+	-	-
Biosynthesis of siderophore group nonribosomal peptides	2,3-Dihydroxybenzoate <-> Enterochelin	entF	-	-	-	+
Biosynthesis of siderophore group nonribosomal peptides	2,3-Dihydroxybenzoate <-> Enterochelin	entE	-	-	-	+
Biosynthesis of siderophore group nonribosomal peptides	2,3-Dihydroxybenzoate <-> (2S,3S)-2,3-Dihydro-2,3-dihydroxybenzoate	entA	-	-	-	+
Biosynthesis of siderophore group nonribosomal peptides	(2S,3S)-2,3-Dihydro-2,3-dihydroxybenzoate <-> Isochorismate	entB	-	-	-	+
Biosynthesis of siderophore group nonribosomal peptides; Ubiquinone and other terpenoid-quinone biosynthesis	Isochorismate <-> Chorismate	pchA (entC)	-	-	-	+
Starch and sucrose metabolism	Amylose <-> Starch	glgB	+	-	+	+
Starch and sucrose metabolism	ADP-glucose + Amylose <-> ADP + Amylose	glgA	+	-	+	+
Riboflavin metabolism	2,5-Diamino-6-(5-phospho-D-ribosylamino)pyrimidin-4(3H)-one + H2O <-> 5-Amino-6-(5'-phosphoribosylamino)uracil + Ammonia	ribD1 (ndmB)	-	-	+	+
Riboflavin metabolism	5-Amino-6-(5'-phospho-D-ribitylamino)uracil + NADP+ <-> 5-Amino-6-(5'-phosphoribosylamino)uracil + NADPH + H+	ribD2	-	-	+	+
Fructose and mannose metabolism	L-Rhamnulose <-> L-Rhamnose	rhaA	+	-	-	+
Fructose and mannose metabolism	L-Rhamnulose 1-P <-> L-Rhamnulose	rhaB	+	-	-	+
Fructose and mannose metabolism	Glycerone-P + S-Lactaldehyde <-> L-Rhamnulose 1-P	rhaD	+	-	-	+
Lysine degradation	L-Lysine <-> N6-Hydroxy-L-Lysine	iucD	-	+	-	-
Lysine degradation	N6-Hydroxy-L-lysine <-> N6-Acetyl-N6-hydroxy-L-lysine	iucB	-	+	-	-
Lysine degradation	N6-Acetyl-N6-hydroxy-L-lysine <-> N2-Citryl-N6-acetyl-N6-hydroxy-L-lysine	iucA	-	+	-	-
Lysine degradation	N2-Citryl-N6-acetyl-N6-hydroxy-L-lysine + N6-Acetyl-N6-hydroxy-L-lysine <-> Aerobactin	iucC	-	+	-	-
Chloroalkane and chloroalkene degradation	Chloroacetic acid <-> Glycolate + Hydrochloric acid	E3.8.1.2: 2-haloacid dehalogenase	+	+	-	+
Chloroalkane and chloroalkene degradation	Chloroacetaldehyde <-> Chloroacetic acid	E1.2.1.3: aldehyde dehydrogenase	+	+	-	+
Benzoate degradation	Succinyl-CoA + 3-Oxoadipate <-> Succinate + 3-Oxoadipyl-CoA	pcaI&J	-	+	-	-
Benzoate degradation	2-Oxo-2,3-dihydrofuran-5-acetate + H2O <-> 3-Oxoadipate	pcaL	-	+	-	-
Benzoate degradation; Polycyclic aromatic hydrocarbon degradation	3,4-Dihydroxybenzoate + Oxygen <-> 3-Carboxy-cis,cis-muconate	pcaG&H	-	+	-	-
Pentose and glucuronate interconversions	D-Glucuronate <-> D-fructuronate	uxaC	+	+	-	+
Pentose and glucuronate interconversions	D-Galacturonate <-> D-Tagaturonate	uxaC	+	+	-	+
Pentose and glucuronate interconversions	D-Altronate <-> D-Tagaturonate	uxaB	+	+	-	+
Pentose and glucuronate interconversions	D-Altronate <-> 2-Dehydro-3-deoxy-D-gluconate	uxaA	+	+	-	+
Cysteine and methionine metabolism; Arginine and proline metabolism; Glutathione metabolism	Putrescine <-> Spermidine	speE	+	+	-	-
Cysteine and methionine metabolism; Arginine and proline metabolism	S-Adenosyl-L-methionine <-> S-Adenosylmethioninamine	speD	+	+	-	-
Cysteine and methionine metabolism	5-Methylthio-D-ribose <-> S-Methyl-5-thio-D-ribose 1-phosphate	mtnK	+	+	-	+
Cysteine and methionine metabolism	S-Methyl-5-thio-D-ribose 1-phosphate <-> S-Methyl-5-thio-D-ribulose 1-phosphate	mtnA	+	+	-	+
Cysteine and methionine metabolism	S-Methyl-5-thio-D-ribulose 1-phosphate <-> 2,3-Diketo-5-methylthiopentyl-1-phosphate	mtnB	+	+	-	+
Cysteine and methionine metabolism	2,3-Diketo-5-methylthiopentyl-1-phosphate <-> 1,2-Dihydroxy-5-(methylthio)pent-1-en-3-one	mtnC	+	+	-	+
Cysteine and methionine metabolism	1,2-Dihydroxy-5-(methylthio)pent-1-en-3-one <-> 4-Methylthio-2-oxobutanoic acid	mtnD	+	-	-	+
Cysteine and methionine metabolism	1,2-Dihydroxy-5-(methylthio)pent-1-en-3-one <-> 3-(Methylthio)propanoate	mtnD	+	-	-	+

## Sheet: BLAST confirmation
Reactions	Gene/s	P. agglomerans lineage	P. ananatis lineage	P. dispersa lineage	P. rodasii lineages
dTDP-4-oxo-6-deoxy-D-glucose <-> dTDP-4-dehydro-beta-L-rhamnose	rfbC	Present P. agglomerans, P. anthophila, P. conspicua, P. deleyi, P. vagans; Absent P. brenneri, Pantoea sp. aB	+	Present P. eucrina, P. dispersa; P. wallisii	Present P. rodasii, P. rwandensis; Absent Pantoea sp. GM01	Clustered
dTDP-L-rhamnose <-> dDTP-4-dehydro-beta-L-rhamnose	rfbD	Present P. agglomerans, P. anthophila, P. conspicua, P. deleyi, P. vagans; Absent P. brenneri, Pantoea sp. aB	+	Present P. dispersa, P. eucrina; Absent P. wallisii	Present P. rodasii, P. rwandensis; Absent Pantoea sp. GM01
2,3-Dihydroxybenzoate <-> Enterochelin	entF	Present P. agglomerans, P. anthophila, P. brenneri, P. conspicua, P. vagans; Absent P. deleyi, Pantoea sp. aB	-	Present P.dispersa, P. wallisii; Absent P. eucrina	+	Clustered
2,3-Dihydroxybenzoate <-> Enterochelin	entE	Present P. agglomerans, P. anthophila, P. brenneri, P. conspicua, P. vagans; Absent P. deleyi, Pantoea sp. aB	-	Present P.dispersa, P. wallisii; Absent P. eucrina	+
2,3-Dihydroxybenzoate <-> (2S,3S)-2,3-Dihydro-2,3-dihydroxybenzoate	entA	Present P. agglomerans, P. anthophila, P. brenneri, P. conspicua, P. vagans; Absent P. deleyi, Pantoea sp. aB	-	Present P.dispersa, P. wallisii; Absent P. eucrina	+
(2S,3S)-2,3-Dihydro-2,3-dihydroxybenzoate <-> Isochorismate	entB	Present P. agglomerans, P. anthophila, P. brenneri, P. conspicua, P. vagans; Absent P. deleyi, Pantoea sp. aB	-	Present P.dispersa, P. wallisii; Absent P. eucrina	+
Isochorismate <-> Chorismate	pchA (entC)	Present P. agglomerans, P. anthophila, P. brenneri, P. conspicua, P. vagans; Absent P. deleyi, Pantoea sp. aB	-	Present P.dispersa, P. wallisii; Absent P. eucrina	+
Amylose <-> Starch	glgB	+	Present	+	+	Excluded
ADP-glucose + Amylose <-> ADP + Amylose	glgA	+	Present	+	+
2,5-Diamino-6-(5-phospho-D-ribosylamino)pyrimidin-4(3H)-one + H2O <-> 5-Amino-6-(5'-phosphoribosylamino)uracil + Ammonia	ribD1 (ndmB)	Present	Present	+	+	Excluded
5-Amino-6-(5'-phospho-D-ribitylamino)uracil + NADP+ <-> 5-Amino-6-(5'-phosphoribosylamino)uracil + NADPH + H+	ribD2	Present	Present	+	+
L-Rhamnulose <-> L-Rhamnose	rhaA	+	Present P. allii, P. ananatis; Absent P. stewartii ssp. stewartii, P. stewartii ssp. indologenes	Present P.dispersa, P. wallisii; Absent P. eucrina	+	Clustered
L-Rhamnulose 1-P <-> L-Rhamnulose	rhaB	+	Present P. allii, P. ananatis; Absent P. stewartii ssp. stewartii, P. stewartii ssp. indologenes	Present P.dispersa, P. wallisii; Absent P. eucrina	+
Glycerone-P + S-Lactaldehyde <-> L-Rhamnulose 1-P	rhaD	+	Present P. allii, P. ananatis; Absent P. stewartii ssp. stewartii, P. stewartii ssp. indologenes	Present P.dispersa, P. wallisii; Absent P. eucrina	+
L-Lysine <-> N6-Hydroxy-L-Lysine	iucD	-	+	-	-	Clustered
N6-Hydroxy-L-lysine <-> N6-Acetyl-N6-hydroxy-L-lysine	iucB	-	+	-	-
N6-Acetyl-N6-hydroxy-L-lysine <-> N2-Citryl-N6-acetyl-N6-hydroxy-L-lysine	iucA	-	+	-	-
N2-Citryl-N6-acetyl-N6-hydroxy-L-lysine + N6-Acetyl-N6-hydroxy-L-lysine <-> Aerobactin	iucC	-	+	-	-
Chloroacetic acid <-> Glycolate + Hydrochloric acid	E3.8.1.2: 2-haloacid dehalogenase (P_rodasii_263)	+	+	-	+	Clustered
Chloroacetaldehyde <-> Chloroacetic acid	E1.2.1.3: aldehyde dehydrogenase (P_rodasii_262)	+	+	-	+
Succinyl-CoA + 3-Oxoadipate <-> Succinate + 3-Oxoadipyl-CoA	pcaI & pcaJ	-	+	-	-	Clustered
2-Oxo-2,3-dihydrofuran-5-acetate + H2O <-> 3-Oxoadipate	pcaL (catD; works with pcaC and pcaD)	-	+	-	-
3,4-Dihydroxybenzoate(Protochatechuate) + Oxygen <-> 3-Carboxy-cis,cis-muconate	pcaG & pcaH	-	+	-	-
D-Glucuronate <-> D-fructuronate	uxaC	+	+	-	+	Clustered
D-Galacturonate <-> D-Tagaturonate	uxaC	+	+	-	+
D-Altronate <-> D-Tagaturonate	uxaB	+	+	Present P.dispersa, P. wallisii; Absent P. eucrina	+
D-Altronate <-> 2-Dehydro-3-deoxy-D-gluconate	uxaA	+	+	Present P.dispersa, P. wallisii; Absent P. eucrina	+
S-Adenosylmethioninamine + Putrescine <-> 5'Methylthioadenosine + Spermidine	speE	+	+	Present P. dispersa; Absent P. eucrina, P. wallisii	Present P. rodasii, P. rwandensis; Absent Pantoea sp. GM01	Clustered
S-Adenosyl-L-methionine <-> S-Adenosylmethioninamine	speD	+	+	Present P. dispersa; Absent P. eucrina, P. wallisii	Present P. rodasii, P. rwandensis; Absent Pantoea sp. GM01
5-Methylthio-D-ribose <-> S-Methyl-5-thio-D-ribose 1-phosphate	mtnK	+	+	-	+	Clustered
S-Methyl-5-thio-D-ribose 1-phosphate <-> S-Methyl-5-thio-D-ribulose 1-phosphate	mtnA	+	+	-	+
S-Methyl-5-thio-D-ribulose 1-phosphate <-> 2,3-Diketo-5-methylthiopentyl-1-phosphate	mtnB	+	+	-	+
2,3-Diketo-5-methylthiopentyl-1-phosphate <-> 1,2-Dihydroxy-5-(methylthio)pent-1-en-3-one	mtnC	+	+	-	+
1,2-Dihydroxy-5-(methylthio)pent-1-en-3-one <-> 4-Methylthio-2-oxobutanoic acid	mtnD	+	Present	-	+
1,2-Dihydroxy-5-(methylthio)pent-1-en-3-one <-> 3-(Methylthio)propanoate	mtnD	+	Present	-	+
